# Supplementary material for: Next-generation large-scale binary protein interaction network for Drosophila melanogaster
Source: PubMed Central journal article supplement (PMC10105736; doi:10.1038/s41467-023-37876-0), 2023-04-15
Supplement: 41467_2023_37876_MOESM3_ESM.pdf [file 41467_2023_37876_MOESM3_ESM.pdf]

## Description of Additional Supplementary Files

### File Name: Supplementary Data 1

**Description:** List of *Drosophila* protein pairs that comprise the positive reference set (PRS) or the random reference set (RRS).

### File Name: Supplementary Data 2

**Description:** Lit-BM-16, a list of protein pairs in the literature for which multiple lines of evidence suggest a binary interaction (built in 2017 based on annotations available through 2016).

### File Name: Supplementary Data 3

**Description:** Lit-BM-20, a list of protein pairs in the literature for which multiple lines of evidence suggest a binary interaction (built in 2021 based on annotations available through 2020).

### File Name: Supplementary Data 4

**Description:** Lit-BS, a list of protein pairs in the literature for which only one line of evidence suggests a binary interaction.

### File Name: Supplementary Data 5

**Description:** FlyBi dataset, the full list of protein pairs that were positive in one or more of the four all-by-all yeast two-hybrid screens described in this study.

### File Name: Supplementary Data 6

**Description:** Results of Mammalian Protein-Protein Interaction Trap (MAPPIT) analysis.

### File Name: Supplementary Data 7

**Description:** Lists of interactors with known autophagy components (list 1) and extensions of that list based on interactions in the FlyBi dataset (lists 2 and 3).

### File Name: Supplementary Data 8

**Description:** Results of RNAi screens for autophagy-related phenotypes for the putative autophagy network (sheet 1) or a random set (sheet 2). Columns D and E report phenotypes observed in the *Atg1* over-expression modifier assay in the adult eye. Columns F and G report phenotypes observed in the mCherry-Atg8 distribution assay in the larval fat body. NIG, National Institute of Genetics of Japan collection RNAi fly stocks. TRiP, Transgenic RNAi Project collection RNAi fly stocks. VDRC, Vienna *Drosophila* Research Center collection RNAi fly stocks.

### File Name: Supplementary Data 9

**Description:** Sequences of primers used to PCR amplify open reading frames (ORFs) from Berkeley *Drosophila* Genome Project clone resource for production of the FlyBi ORF clone resource.
