# Supplementary material for: Next-generation large-scale binary protein interaction network for Drosophila melanogaster
Source: Springer Nature journal article supplement (doi:10.1038/s41467-023-37876-0), 2023-04-15
Supplement: MOESM8 [file 41467_2023_37876_MOESM8_ESM.xlsx.zst]

(listing pending)
